# Supplementary material
Source: Springer Nature journal article supplement (https://www.springermedizin.de/resource/supplementary/12885_2014_4997_MOESM5_ESM.pdf/9467968)

PLVAP Gene Expression by Microarray

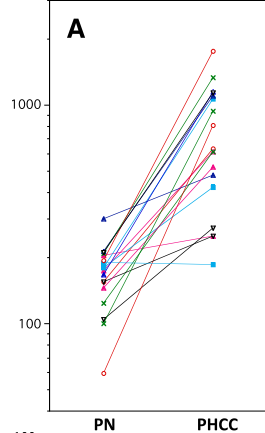

PLVAP mRNA by qRT-PCR

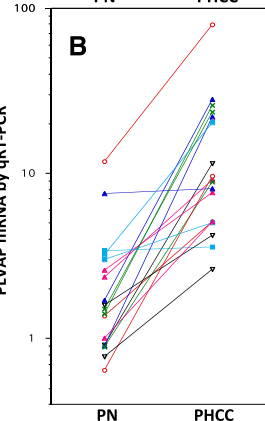

**C**

HCC

Adjacent Liver Tissue

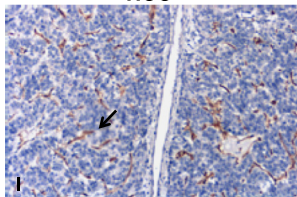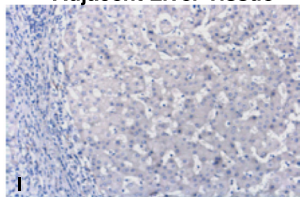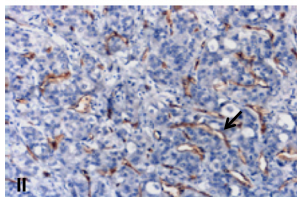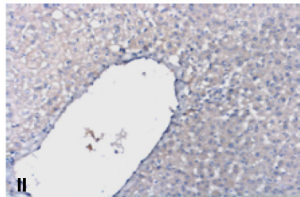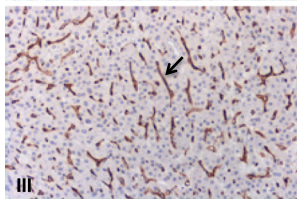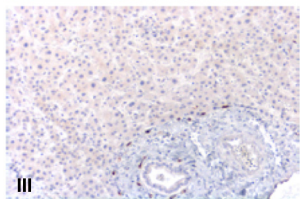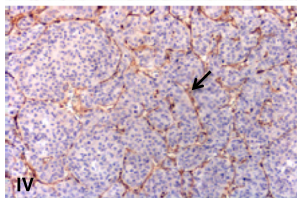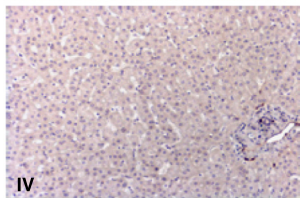

Supplement: MOESM5 [file 9467968]
